# Supplementary material for: Homologous Recombination DNA Repair Pathway Disruption and Retinoblastoma Protein Loss Are Associated with Exceptional Survival in High-Grade Serous Ovarian Cancer
Source: Oxford University Press journal article supplement (doi:10.1158/1078-0432.ccr-17-1621), 2017-10-23
Supplement: 10780432ccr171621-sup-184432_3_supp_4312175_vxbwf6.xlsx [file 10780432ccr171621-sup-184432_3_supp_4312175_vxbwf6.xlsx]

## Sheet: Sheet1
Supplementary Table S1: Histotype classification
Patient ID	Primary Tumor Sample Type Sequenced	TP53 Sequence Mutation Type	p53 Expression (Immunohistochemical Staining Pattern)	WT1 Expression (Immunohistochemical Staining Pattern)	Overall Grade On Pathology Review	Histological subtype - Post Pathology Review	Reason for Exclusion
59	[Biospecimen not available]	[Not tested]	[Not tested]	[Not tested]	3	HGSC
299	[Biospecimen not available]	[Not tested]	Overexpression	Present	[Neoadjuvant treatment]	HGSC
469	[Biospecimen not available]	[Not tested]	Overexpression	Present	3	HGSC
1029	[Biospecimen not available]	[Not tested]	Overexpression	Present	3	HGSC
1033	Fresh-frozen	Frameshift	Normal	Present	2	HGSC
1203	Fresh-frozen	Missense	Overexpression	Present	2	HGSC
1276	Fresh-frozen	Missense	Overexpression	Present	3	HGSC
1607	[Biospecimen not available]	[Not tested]	Normal	Present	3	HGSC
1888	[Biospecimen not available]	[Not tested]	[Not tested]	[Not tested]	3	HGSC
1897	[Biospecimen not available]	[Not tested]	Overexpression	Present	3	HGSC
2197	Fresh-frozen	Missense	Overexpression	Present	3	HGSC
2378	Fresh-frozen	Frameshift	Absence	Present	3	HGSC
2476	Fresh-frozen	Nonsense	[Not tested]	Present	2	HGSC
2517	FFPE	Frameshift	Absence	Present	3	HGSC
2797	[Biospecimen not available]	[Not tested]	Absence	Present	3	HGSC
2811	Fresh-frozen	Missense	Overexpression	Present	3	HGSC
2846	Fresh-frozen	Missense	Overexpression	Present	3	HGSC
3158	Fresh-frozen	Missense	Overexpression	Absent	3	HGSC
3374	Fresh-frozen	Frameshift	Absence	Present	3	HGSC
3903	FFPE	Missense	Overexpression	Present	3	HGSC
4112	Fresh-frozen	Frameshift	Absence	Present	3	HGSC
4451	Fresh-frozen	Missense	Overexpression	Present	[Neoadjuvant treatment]	HGSC
4841	FFPE	Missense	Overexpression	Present	2	HGSC
4893	Fresh-frozen	Missense	Overexpression	Present	3a	HGSC
4956	Fresh-frozen	Missense	Overexpression	Present	3	HGSC
4985	Fresh-frozen	Missense	Overexpression	Present	3	HGSC
5021	Fresh-frozen	Nonsense	Absence	Present	3	HGSC
5102	FFPE	Missense	Overexpression	Present	3	HGSC
5232	Fresh-frozen	Missense	Overexpression	Present	3	HGSC
5510	Fresh-frozen	Missense	Overexpression	Present	3	HGSC
5693	FFPE	Missense	Overexpression	Present	2	HGSC
6222	FFPE	Missense	Overexpression	Present	3	HGSC
6321	Fresh-frozen	Splice site	Cytoplasmic	Present	3	HGSC
6463	Fresh-frozen	Missense	Overexpression	Present	3	HGSC
6483	Fresh-frozen	Missense	Overexpression	Present	3	HGSC
6486	Fresh-frozen	Nonsense	Cytoplasmic	Present	3	HGSC
7438	Fresh-frozen	Nonsense	Absence	Present	2	HGSC
7513	[Biospecimen not available]	[Not tested]	Absence	Present	2	HGSC
7688	Fresh-frozen	Missense	[Not tested]	[Not tested]	2	HGSC
8333	[Biospecimen not available]	[Not tested]	Overexpression	Present	[Neoadjuvant treatment]	HGSC
8424	Fresh-frozen	Missense	Overexpression	Present	3	HGSC
8456	[Biospecimen not available]	[Not tested]	Absence	Present	2	HGSC
8471	Fresh-frozen	Missense	[Not tested]	[Not tested]	3	HGSC
8473	Fresh-frozen	Nonsense	[Not tested]	Present	3	HGSC
8781	Fresh-frozen	In-frame deletion	Overexpression	Present	3	HGSC
8836	Fresh-frozen	Nonsense	Normal	Present	3	HGSC
9006	Fresh-frozen	Frameshift	Absence	Present	3	HGSC
9374	Fresh-frozen	Missense	Overexpression	Present	2	HGSC
9675	FFPE	Missense	Absence	Present	2	HGSC
9850	[Biospecimen not available]	[Not tested]	Overexpression	Present	3	HGSC
9998	Fresh-frozen	Nonsense	Absence	Present	3	HGSC
10124	Fresh-frozen	Missense	Overexpression	Present	3	HGSC
10418	Fresh-frozen	Missense	Overexpression	Present	3	HGSC
10463	Fresh-frozen	Missense	Overexpression	Present	2	HGSC
10703	FFPE	Frameshift	Absence	Present	3	HGSC
10719	Fresh-frozen	Missense	Overexpression	Present	3	HGSC
10809	Fresh-frozen	Missense	Overexpression	Present	3	HGSC
10810	Fresh-frozen	Missense	Overexpression	Present	[Not available]	HGSC
10928	Fresh-frozen	Wild-type	Absence	Present	3	HGSC
11024	Fresh-frozen	Splice site	Normal	Present	[Not available]	HGSC
11097	Fresh-frozen	Nonsense	Absence	Absent	2	HGSC
11136	[Biospecimen not available]	[Not tested]	Overexpression	Present	3	HGSC
11232	[Biospecimen not available]	[Not tested]	Overexpression	Present	[Neoadjuvant treatment]	HGSC
11275	Fresh-frozen	Frameshift	[Not tested]	[Not tested]	3	HGSC
11293	FFPE	Wild-type	Absence	Present	3	HGSC
11539	FFPE	Missense	Overexpression	Present	3	HGSC
11724	Fresh-frozen	Missense	Overexpression	Present	3	HGSC
11757	Fresh-frozen	Missense	Overexpression	Present	3	HGSC
11866	Fresh-frozen	Missense	Overexpression	Present	2	HGSC
11935	Fresh-frozen	Splice site	Absence	Present	3	HGSC
12048	Fresh-frozen	Missense	Overexpression	Present	3	HGSC
12154	Fresh-frozen	Missense	Overexpression	Present	3	HGSC
12182	Fresh-frozen	Frameshift	Absence	Present	2	HGSC
12185	Fresh-frozen	Frameshift	Absence	Present	3	HGSC
15017	Fresh-frozen	Missense	Overexpression	Present	3	HGSC
15018	Fresh-frozen	In-frame insertion	Overexpression	Present	2	HGSC
15023	Fresh-frozen	Missense	Overexpression	Present	2	HGSC
15030	Fresh-frozen	Missense	Overexpression	Present	3	HGSC
15035	Fresh-frozen	Missense	Overexpression	Present	2	HGSC
15037	Fresh-frozen	Missense	Overexpression	Present	3	HGSC
15045	Fresh-frozen	Splice site	Normal	Present	3	HGSC
15051	Fresh-frozen	Frameshift	Normal	Present	3	HGSC
15060	Fresh-frozen	Missense	Overexpression	Present	3	HGSC
15062	Fresh-frozen	Missense	Overexpression	Present	2	HGSC
15069	Fresh-frozen	Missense	Overexpression	Present	3	HGSC
15075	Fresh-frozen	Missense	Overexpression	Present	3	HGSC
15216	Fresh-frozen	Frameshift	Normal	[Not tested]	3	HGSC
15296	FFPE	Missense	Overexpression	Present	3	HGSC
65677	Fresh-frozen	Missense	Overexpression	Present	3	HGSC
66044	FFPE	Splice site	Overexpression	Present	3	HGSC
66048	FFPE	Missense	Overexpression	Present	3	HGSC
66049	Fresh-frozen	Frameshift	Absence	Present	3	HGSC
66050	Fresh-frozen	Missense	Overexpression	Present	3	HGSC
66052	Fresh-frozen	Frameshift	[Not tested]	Absent	3	HGSC
66053	FFPE	Splice site	Overexpression	Present	3	HGSC
66055	Fresh-frozen	Splice site	Absence	Present	3	HGSC
3690	[Biospecimen not available]	[Not tested]	[Not tested]	[Not tested]	No grade	LMP/LGSC	Exclude, LGSC, no biospecimens available
10131	Fresh-frozen	Wild-type	Normal	Present	[Not available]	Likely LGSC	Exclude, pathology review not available, TP53 sequence wild-type, p53 expression normal
9128	Fresh-frozen	Wild-type	[Not tested]	[Not tested]	No grade	LMP/LGSC	Exclude, molecular profile consistent with LGSC (NRAS mutationb)
5118	[Biospecimen not available]	[Not tested]	Normal	Present	1	LGSC	Exclude, LGSC, p53 normal
6223	[Biospecimen not available]	[Not tested]	Normal	Present	1	LGSC	Exclude, LGSC, p53 normal
10916	[Biospecimen not available]	[Not tested]	[Not tested]	[Not tested]	1	LGSC	Exclude, LGSC, no biospecimens available
2044	Fresh-frozen	Wild-type	Normal	Present	2	Likely LGSC	Exclude, molecular profile consistent with LGSC (TP53 sequence wild-type, NRAS mutationb)
6520	Fresh-frozen	Missense	Overexpression	Present	2	Likely LGSC	Exclude, molecular profile consistent with LGSC (KRAS mutationc)
2107	[Biospecimen not available]	[Not tested]	Normal	Present	[Neoadjuvant treatment]	[Unknown]	Exclude, not enough evidence that tumor is HGSC
3847	[Biospecimen not available]	[Not tested]	[Not tested]	[Not tested]	[Neoadjuvant treatment]	[Unknown]	Exclude, not enough evidence that tumor is HGSC
9077	Fresh-frozen	Wild-type	Normal	Present	[Neoadjuvant treatment]	[Unknown]	Exclude, not enough evidence that tumor is HGSC
9682	Fresh-frozen	Wild-type	[Not tested]	[Not tested]	[Neoadjuvant treatment]	[Unknown]	Exclude, not enough evidence that tumor is HGSC
12336	[Biospecimen not available]	[Not tested]	Normal	Present	[Neoadjuvant treatment]	[Unknown]	Exclude, not enough evidence that tumor is HGSC
66051	[Biospecimen not available]	[Not tested]	[Not tested]	[Not tested]	[Neoadjuvant treatment]	[Unknown]	Exclude, not enough evidence that tumor is HGSC
6320	[Biospecimen not available]	[Not tested]	Absence	Absent	2	Likely HGSC	Exclude, no biospecimens available
4374	[Biospecimen not available]	[Not tested]	[Not tested]	[Not tested]	[Not available]	[Unknown]	Exclude, pathology review not available, no biospecimens available
aPoor, moderate and well-differentiated patterns present
bEmmanuel et al. Genomic classification of serous ovarian cancer with adjacent borderline differentiates RAS-pathway and TP53-mutant tumors and identifies NRAS as an oncogenic driver. Clinical Cancer Res. 2014 20: 1-13
cEtemadmoghadam et al. EIF1AX and NRAS mutations co-occur and cooperate in low-grade serous ovarian carcinomas. Cancer Res. 10.1158/0008-5472.CAN-16-2224
Abbreviations: HGSC, high-grade serous carcinoma; LGSC, low-grade serous carcinoma; LMP, low malignant potential.
