# Supplementary material for: Homologous Recombination DNA Repair Pathway Disruption and Retinoblastoma Protein Loss Are Associated with Exceptional Survival in High-Grade Serous Ovarian Cancer
Source: Oxford University Press journal article supplement (doi:10.1158/1078-0432.ccr-17-1621), 2017-10-23
Supplement: 10780432ccr171621-sup-184432_3_supp_4312178_hxbwf6.xlsx [file 10780432ccr171621-sup-184432_3_supp_4312178_hxbwf6.xlsx]

## Sheet: Sheet1
Supplementary Table S5. Loss-of-function mutations in homologous recombination DNA repair pathway genes
Patient ID	Specimen Type	Collection Point	FFPE	Genea	Genomic Variant	Reference Allele	Variant Allele	Exon	cDNA Changeb	Protein Effectb	Mutation Typec	Variant Allele Read Count	Reference Allele Read Count	Total Reads Over Variant	Variant Allele Ratio	LOH	No. of Cases with Variant	Detection Method	dbSNP ID	Global MAF (dbSNP)	Global MAF (EVS)	Mutation Verification*	Germline / Somatic	Predicted NMD
15296	Tumor	Primary	Yes	ATR	chr3:g.142277498_142277500delAGA	AGA	-	8	c.1851_1853del	p.(Leu618del)	In-frame deletion	627	1	628	0.998408	Loss of WT	1	Panel sequencing	-	-	-	-	Somatic	No
66049	Tumor	Primary	-	BRCA1	Exon 4-6 duplication	-	-	Exons 4 to 6	c.135-?_441+? Dup	p.(Gln148Ilefs*20)	Frameshift	ND	ND	-	-	-	1	Panel sequencing	-	-	-	h	Germline	Yes
10463	Tumor	Primary	-	BRCA1	chr17:g.41258530delA	A	-	4	c.155delT	p.(Leu52Profs*17)	Frameshift	250	374	624	0.400641	No	1	Panel sequencing	-	-	-	-	Somatic	Yes
15060	Tumor	Primary	-	BRCA1	chr17:g.41258504A>C	A	C	4	c.181T>G	p.(Cys61Gly)	Missense	474	769	1243	0.381335	No	2	Panel sequencing	rs28897672	-	-	-	Untested	No
5693	Tumor	Primary	Yes	BRCA1	chr17:g.41258504A>C	A	C	4	c.181T>G	p.(Cys61Gly)	Missense	196	143	339	0.578171	No	2	Panel sequencing	rs28897672	-	-	h	Germline	No
15017	Tumor	Primary	-	BRCA1	chr17:g.41256144del	A	-	6	c.436del	p.(Ser146Profs*17)	Frameshift	1162	1570	2732	0.425329	No	1	Panel sequencing	-	-	-	-	Somatic	Yes
15045	Tumor	Primary	-	BRCA1	chr17:g.41251894C>A	C	A	7	c.445G>T	p.(Glu149*)	Nonsense	816	845	1661	0.49127	No	1	Panel sequencing	-	-	-	d	Somatic	Yes
15296	Tumor	Primary	Yes	BRCA1	chr17:g.41246509delG	G	-	10	c.1039delC	p.(Leu347Cysfs*27)	Frameshift	3655	565	4220	0.866114	Loss of WT	1	Panel sequencing	-	-	-	-	Somatic	Yes
12185	Tumor	Primary	-	BRCA1	chr17:g.41246335_41246374del	40 bp	-	10	c.1175_1214del	p.(Leu392Glnfs*5)	Frameshift	2214	449	2663	0.831393	Loss of WT¶	2	Panel sequencing	-	-	-	h	Germline	Yes
9998	Tumor	Primary	-	BRCA1	chr17:g.41246335_41246374del	40 bp	-	10	c.1175_1214del	p.(Leu392Glnfs*5)	Frameshift	1872	588	2460	0.760976	Loss of WT¶	2	Panel sequencing	-	-	-	h	Germline	Yes
5021	Tumor	Primary	-	BRCA1	chr17:g.41245587delT	T	-	10	c.1961delA	p.(Lys654Serfs*47)	Frameshift	2666	1136	3802	0.70121	Loss of WT	1	Panel sequencing	rs80357522	-	-	h	Germline	Yes
7438	Tumor	Primary	-	BRCA1	chr17:g.41245210G>A	G	A	10	c.2338C>T	p.(Gln780*)	Nonsense	1685	794	2479	0.67971	No	1	Panel sequencing	rs80356945	-	-	h	Germline	Yes
8471	Tumor	Primary	-	BRCA1	chr17:g.41244866_41244869delTTTC	TTTC	-	10	c.2679_2682delGAAA	p.(Lys893Asnfs*106)	Frameshift	3272	372	3644	0.897914	Loss of WT	1	Panel sequencing	rs80357596	-	-	h	Germline	Yes
9374	Tumor	Primary	-	BRCA1	chr17:g.41244866_41244867delTT	TT	-	10	c.2681_2682delAA	p.(Lys894Thrfs*8)	Frameshift	1766	548	2314	0.763181	Loss of WT	1	Panel sequencing	rs80357971	-	-	h	Germline	Yes
4112	Tumor	Primary	-	BRCA1	chr17:g.41244832T>A	T	A	10	c.2716A>T	p.Lys906*	Nonsense	74	14	88	0.840909	Loss of WT	1	WGS	-	-	-	e, f, h	Germline	Yes
15035	Tumor	Primary	-	BRCA1	chr17:g.41244826C>A	C	A	10	c.2722G>T	p.(Glu908*)	Nonsense	1991	258	2249	0.885282	Loss of WT	1	Panel sequencing	rs80356978	-	7.68876e-05	-	Untested	Yes
66053	Tumor	Primary	Yes	BRCA1	chr17:g.41244740delA	A	-	10	c.2808delT	p.(Asp936Glufs*64)	Frameshift	860	402	1262	0.681458	No	1	Panel sequencing	-	-	-	-	Untested	Yes
2846	Tumor	Primary	-	BRCA1	chr17:g.41244712_41244714delinsG	TAC	G	10	c.2834_2836delinsC	p.(Ser945Thrfs*6)	Frameshift	1829	567	2396	0.763356	Loss of WT	1	Panel sequencing	-	-	-	h	Germline	Yes
7688	Tumor	Primary	-	BRCA1	chr17:g.41244461dupA	-	A	10	c.3087dup	p.(Asn1030*)	Frameshift	795	1385	2180	0.364679	No	1	Panel sequencing	-	-	-	-	Somatic	Yes
8473	Tumor	Primary	-	BRCA1	chr17:g.41244319_41244320del	CT	-	10	c.3228_3229del	p.Gly1077Alafs*8	Frameshift	29	4	33	0.878788	Loss of WT	1	WGS				e, f, h	Germline	Yes
4956	Tumor	Primary	-	BRCA1	chr17:g.41244022delC	C	-	10	c.3526delG	p.Val1176Phefs*34	Frameshift	21	32	53	0.396226	No	1	WGS	-	-	-	h	Somatic	Yes
2811	Tumor	Primary	-	BRCA1	chr17:g.41243789_41243792del	AGAC	-	10	c.3756_3759del	p.(Ser1253Argfs*10)	Frameshift	2103	743	2846	0.738932	Loss of WT	3	Panel sequencing	rs80357868	-	0.0210131	-	Untested	Yes
11757	Tumor	Primary	-	BRCA1	chr17:g.41243789_41243792del	AGAC	-	10	c.3756_3759del	p.(Ser1253Argfs*10)	Frameshift	1954	374	2328	0.839347	Loss of WT	3	Panel sequencing	rs80357868	-	0.0210131	h	Germline	Yes
3158	Tumor	Primary	-	BRCA1	chr17:g.41243789_41243792del	AGAC	-	10	c.3756_3759del	p.Ser1253Argfs*10	Frameshift	20	1	21	0.952381	Loss of WT	3	WGS	rs80357868	-	0.0210131	f, h	Germline	Yes
8424	Tumor	Primary	-	BRCA1	chr17:g.41243789dupA	-	A	10	c.3759dup	p.(Lys1254*)	Frameshift	2129	433	2562	0.830991	Loss of WT	1	Panel sequencing	rs80357687	-	-	h	Germline	Yes
1033	Tumor	Primary	-	BRCA1	chr17:g.41234588_41234591delCTCT	CTCT	-	12	c.4187_4190delAGAG	p.(Gln1396Argfs*8)	Frameshift	2043	745	2788	0.732783	Loss of WT	1	Panel sequencing	-	-	-	-	Somatic	Yes
15075	Tumor	Primary	-	BRCA1	chr17:g.41234451G>A	G	A	12	c.4327C>T	p.(Arg1443*)	Nonsense	1723	921	2644	0.651664	No	1	Panel sequencing	rs41293455	-	-	h	Germline	Yes
6222	Tumor	Primary	Yes	BRCA1	chr17:g.41228505C>T	C	T	13	c.4484G>A	p.(Arg1495Lys)	Missense	380	382	762	0.498688	No	1	Panel sequencing	rs80357389	-	-	-	Somatic	No
66044	Tumor	Primary	Yes	BRCA1	chr17:g.41226506_41226515delinsCC	TCATCTAATG	CC	14	c.4508_4517delinsGG	p.(Ser1503Trpfs*2)	Frameshift	95	215	310	0.306452	No	1	Panel sequencing	-	-	-	-	Untested	Yes
15023	Tumor	Primary	-	BRCA1	chr17:g.41222949_41222967del	TCTTCTGGGGTCAGGCCAG	-	15	c.4964_4982del	p.(Ser1655Tyrfs*16)	Frameshift	3294	651	3945	0.834981	Loss of WT	1	Panel sequencing	rs80359876	-	-	d, e, f	Germline	Yes
15216	Tumor	Primary	-	BRCA1	chr17:g.41209079_41209080insG	-	G	19	c.5266dup	p.Gln1756Profs*74	Frameshift	32	9	41	0.780488	Loss of WT	1	WGS	-	-	-	e, f, h	Germline	Yes
2378	Tumor	Primary	-	BRCA1	chr17:g.41201164C>A	C	A	21	c.5380G>T	p.Glu1794*	Nonsense	49	13	62	0.790323	Loss of WT	1	WGS	-	-	-	e, h	Somatic	Yes
12048	Tumor	Primary	-	BRCA2	chr13:g.32905124_32905127delGACA	GACA	-	9	c.755_758delACAG	p.(Asp252Valfs*24)	Frameshift	272	221	493	0.551724	No	1	Panel sequencing	rs80359659	-	-	h	Germline	Yes
6486	Tumor	Primary	-	BRCA2	chr13:g.32910901T>G	T	G	11	c.2409T>G	p.(Tyr803*)	Nonsense	1494	888	2382	0.627204	No	1	Panel sequencing	rs80358504	-	-	h	Germline	Yes
10719	Tumor	Primary	-	BRCA2	chr13:g.32911862C>T	C	T	11	c.3370C>T	p.Gln1124*	Nonsense	55	2	57	0.964912	Loss of WT	1	WGS	-	-	-	h	Somatic	Yes
3374	Tumor	Primary	-	BRCA2	chr13:g.32913370_32913401del	TCTCAAAACATCAAAAAGTATCTTTTTGAAAG	-	11	c.4879_4910del	p.(Leu1627*)	Frameshift	732	1814	2546	0.28751	No	1	Panel sequencing	-	-	-	-	Somatic	Yes
3903	Tumor	Primary	Yes	BRCA2	chr13:g.32914438delT	T	-	11	c.5946delT	p.(Ser1982Argfs*22)	Frameshift	417	13	430	0.969767	Loss of WT	1	Panel sequencing	rs80359550	-	0.016	h	Germline	Yes
10418	Tumor	Primary	-	BRCA2	chr13:g.32914557C>G	C	G	11	c.6065C>G	p.(Ser2022*)	Nonsense	2772	310	3082	0.899416	Loss of WT	1	Panel sequencing	rs80358843	-	-	-	Untested	Yes
6463	Tumor	Primary	-	BRCA2	chr13:g.32914838_32914850del	CACTGTGTAAACT	-	11	c.6346_6358del	p.His2116Glnfs*17	Frameshift	20	25	45	0.444444	No	1	WGS	-	-	-	-	Somatic	Yes
8836	Tumor	Primary	-	BRCA2	Exons 14-16 deletion	Exons 14-16	-	Exons 14 to 16	c.(7008-?_7805+1)del	p.?	Deletion (3,065+ bp)	1568	260	1828	0.857768	Loss of WT¶	1	Panel sequencing	-	-	-	h	Germline	Yes
15018	Tumor	Primary	-	BRIP1	chr17:g.59857668_59857669insT	-	T	13	c.1888_1889insA	p.Thr630Asnfs*9	Frameshift	58	6	64	0.90625	Loss of WT	1	WGS	-	-	-	e, f	Germline	Yes
15069	Tumor	Primary	-	BRIP1	chr17:g.59793404G>C	G	C	17	c.2400C>G	p.Tyr800*	Nonsense	38	12	50	0.76	Loss of WT	1	WGS	-	-	-	e, f	Germline	Yes
11275	Tumor	Primary	-	CDK12	chr17:g.37619135A>T	A	T	1	c.811A>T	p.(Arg271*)	Nonsense	104209	1305	105514	0.987632	Loss of WT	1	Panel sequencing	-	-	-	-	Untested	Yes
4841	Tumor	Primary	Yes	CDK12	chr17:g.37680982C>T	C	T	12	c.3151C>T	p.(Arg1051*)	Nonsense	331	30	361	0.916898	Loss of WT	1	Panel sequencing	-	-	-	-	Untested	Yes
4451	Tumor	Primary	-	CHEK1	chr11:g.125514098C>T	C	T	10	c.1036C>T	p.(Gln346*)	Nonsense	1549	3695	5244	0.295385	No	1	Panel sequencing	rs199535573	-	7.7e-05	-	Untested	Yes
11293	Tumor	Primary	Yes	CHEK2	chr22:g.29091857delG	G	-	11	c.1100delC	p.(Thr367Metfs*15)	Frameshift	1731	951	2682	0.645414	No	1	Panel sequencing	-	-	-	-	Untested	Yes
15030	Tumor	Primary	-	PTEN	chr10:g.89614693_90973597del	1.36 Mb del	-	Whole gene	c.-9534_*1248368del	p.?	Deletion (1.36 Mb)	80	35	115	0.695652	Loss of WT	1	WGS	-	-	-	g	Somatic	No
2476	Tumor	Primary	-	PTEN	chr10:g.89617271_89624949del	7,679 bp del	-	1	c.-6956_79+644del	p.?	Deletion (7,679 bp)	33	9	42	0.785714	Loss of WT	1	WGS	-	-	-	g	Somatic	No
6321	Tumor	Primary	-	RAD51C	chr17:g.56786751_56787647inv	896 bp inv	-	5	c.706-469_837+296inv	p.Val236_Ala279del	Inversion (896 bp)	57	8	65	0.876923	Loss of WT¶	1	WGS	-	-	-	e, f	Germline	No
4985	Tumor	Primary	-	RAD51D	chr17:g.33446134dupT	-	T	2	c.140dup	p.(Tyr47*)	Frameshift	755	985	1740	0.433908	No	1	Panel sequencing	-	-	-	-	Untested	Yes
Abbreviations: chr, chromosome; del, deletion; EVS, Exome Variant Server (http://evs.gs.washington.edu/EVS/); FFPE, formalin-fixed paraffin embedded; ins, insertion; inv, inversion; LOH, loss-of-heterozygosity; MAF, minor allele frequency; NMD, nonsense mediated decay; ND, not determined; WGS, whole-genome sequencing; WT, wild-type.
aGenBank accession numbers: ATR, NM_001184.3; BRCA1, NM_007294.3; BRCA2, NM_000059.3; BRIP1, NM_032043.2; CDK12, NM_015083.1; CHEK1, NM_001274.4; CHEK2, NM_007194.3; PTEN, NM_000314.4; RAD51C, NM_058216.1; RAD51D, NM_002878.3.
bVariant nomenclature according to Human Genome Variation Society (HGVS) guidelines (http://www.hgvs.org/). Variants are ordered by gene name and codon number.
cLoss-of-function mutations include nonsense, splice site and frameshift mutations that result in an early stop codon, and missense mutations previously reported as pathogenic or clinically significant.
*Mutation verified in matched independent and/or orthogonal data sets by one or more of the following methods: d, whole-genome sequencing of tumor DNA (Patch et al., 2015); e, transcriptome sequencing of tumor RNA (Patch et al., 2015); f, whole-genome sequencing of germline DNA (Patch et al., 2015); g, SNP array copy number analysis (Patch et al., 2015); h, either clinical testing or previous seq…
¶Variant allele ratios for large deletions was inferred from approximate read counts in the deleted region and the regions flanking the deletion.
