# Supplementary material for: Homologous Recombination DNA Repair Pathway Disruption and Retinoblastoma Protein Loss Are Associated with Exceptional Survival in High-Grade Serous Ovarian Cancer
Source: Oxford University Press journal article supplement (doi:10.1158/1078-0432.ccr-17-1621), 2017-10-23
Supplement: 10780432ccr171621-sup-184432_3_supp_4312179_jxbwf7.xlsx [file 10780432ccr171621-sup-184432_3_supp_4312179_jxbwf7.xlsx]

## Sheet: Sheet1
Supplementary Table S4. TP53 mutations
Patient ID	Genomic Variant	Reference Allele	Variant Allele	Exon	cDNA Changea,b	Protein Effectb	Mutation Type	Variant Allele Read Count	Reference Allele Read Count	Total Reads Over Variant	Variant Allele Ratio	LOH	No. of Cases with Genomic Variant	TP53 Mutated Residue	Recurrently Mutated Residue (Mutated in >1 Case)	Detection Method	dbSNP ID	Independent Sequence Verification*	Previously Reported (IARC TP53 Database)	Predicted NMD	p53 Expression (Immunohistochemical Staining Pattern)
10703	chr17:g.7579534delT	T	-	4	c.153delA	p.(Glu51Aspfs*72)	Frameshift	577	25	602	0.958472	Loss of WT	1	Glu51	No	Panel sequencing	-	-	-	Yes	Absence
12185	chr17:g.7579511delC	C	-	4	c.176delG	p.(Gly59Valfs*64)	Frameshift	1658	468	2126	0.779868	Loss of WT	1	Gly59	No	Panel sequencing	-	-	-	Yes	Absence
15216	chr17:g.7579432_7579433insGG	-	GG	4	c.254_255insCC	p.Ala86Leufs*38	Frameshift	12	16	28	0.428571	No	1	Ala86	No	WGS	-	e	-	Yes	Normal
2517	chr17:g.7579417_7579420del	GGAG	-	4	c.267_270del	p.(Ser90Glyfs*32)	Frameshift	1146	224	1370	0.836496	Loss of WT	1	Ser90	No	Panel sequencing	-	-	-	Yes	Absence
9006	chr17:g.7579360_7579370del	GAAACCGTAGC	-	4	c.317_327del	p.Ser106Thrfs*39	Frameshift	14	17	31	0.451613	No	1	Ser106	No	WGS	-	e	-	Yes	Absence
66044	chr17:g.7578556T>C	T	C	Intron 4	c.376-2A>G	p.?	Splice site	684	489	1173	0.58312	No	1	Tyr126	Yes	Panel sequencing	-	-	Yes	Yes	Overexpressed
66053	chr17:g.7578555C>A	C	A	Intron 4	c.376-1G>T	p.?	Splice site	2298	436	2734	0.840527	Loss of WT	1	Tyr126	Yes	Panel sequencing	-	-	Yes	Yes	Overexpressed
11097	chr17:g.7578552G>T	G	T	5	c.378C>A	p.(Tyr126*)	Nonsense	1774	1007	2781	0.6379	No	1	Tyr126	Yes	Panel sequencing	-	-	Yes	Yes	Absence
11275	chr17:g.7578547delG	G	-	5	c.383delC	p.(Pro128Leufs*42)	Frameshift	2861	1304	4165	0.686915	No	1	Pro128	No	Panel sequencing	-	-	-	Yes	[Not tested]
2378	chr17:g.7578537delG	G	-	5	c.393delC	p.Asn131Lysfs*39	Frameshift	9	8	17	0.529412	No	1	Asn131	No	WGS	-	c, e	Yes	Yes	Absence
6463	chr17:g.7578529A>C	A	C	5	c.401T>G	p.Phe134Cys	Missense	21	13	34	0.617647	No	1	Phe134	No	WGS	-	e	Yes	-	Overexpressed
2846	chr17:g.7578507G>C	C	C	5	c.423C>G	p.(Cys141Trp)	Missense	1729	1060	2789	0.619935	No	1	Cys141	No	Panel sequencing	-	-	Yes	-	Overexpressed
15069	chr17:g.7578479G>T	G	T	5	c.451C>A	p.Pro151Thr	Missense	17	9	26	0.653846	No	1	Pro151	Yes	WGS	rs28934874	e	Yes	-	Overexpressed
15030	chr17:g.7578478G>C	G	C	5	c.452C>G	p.Pro151Arg	Missense	1954	2153	4107	0.475773	No	1	Pro151	Yes	Panel sequencing	-	d, e	Yes	-	Overexpressed
15296	chr17:g.7578456_7578457delinsAG	GC	AG	5	c.473_474delinsCT	p.Arg158Pro	Missense	1075	2159	3234	0.332406	No	1	Arg158	No	Panel sequencing	-	d, e	Yes	-	Overexpressed
15018	chr17:g.7578451_7578452insTGGCGC	-	TGGCGC	5	c.473_478dupGCGCCA	p.Ala159_Met160insSerAla	In-frame insertion	27	7	34	0.794118	Loss of WT	1	Ala159	No	WGS	-	c, e	Yes	-	Overexpressed
66050	chr17:g.7578442T>C	T	C	5	c.488A>G	p.(Tyr163Cys)	Missense	3577	1565	5142	0.695644	Loss of WT	1	Tyr163	No	Panel sequencing	rs148924904	-	Yes	-	Overexpressed
2476	chr17:g.7578437G>A	G	A	5	c.493C>T	p.Gln165*	Nonsense	25	7	32	0.78125	Loss of WT	1	Gln165	No	WGS	-	c, e	Yes	Yes	[Not tested]
66048	chr17:g.7578406C>T	C	T	5	c.524G>A	p.(Arg175His)	Missense	903	155	1058	0.853497	Loss of WT	3	Arg175	Yes	Panel sequencing	rs28934578	-	Yes	-	Overexpressed
3903	chr17:g.7578406C>T	C	T	5	c.524G>A	p.(Arg175His)	Missense	1760	130	1890	0.931217	Loss of WT	3	Arg175	Yes	Panel sequencing	rs28934578	-	Yes	-	Overexpressed
10463	chr17:g.7578406C>T	C	T	5	c.524G>A	p.(Arg175His)	Missense	2511	2096	4607	0.54504	No	3	Arg175	Yes	Panel sequencing	rs28934578	-	Yes	-	Overexpressed
15035	chr17:g.7578404A>G	A	G	5	c.526T>C	p.(Cys176Arg)	Missense	1872	301	2173	0.861482	Loss of WT	1	Cys176	No	Panel sequencing	-	-	Yes	-	Overexpressed
8781	chr17:g.7578395_7578400del	GGTGGG	-	5	c.530_535del	p.(Pro177_His178del)	In-frame deletion	476	776	1252	0.380192	No	1	Pro177	No	Panel sequencing	-	-	-	-	Overexpressed
10809	chr17:g.7578394T>C	T	C	5	c.536A>G	p.(His179Arg)	Missense	1106	532	1638	0.675214	No	1	His179	No	Panel sequencing	-	-	Yes	-	Overexpressed
66055	chr17:g.7578370C>T	C	T	Intron 5	c.559+1G>A	p.?	Splice site	1906	477	2383	0.799832	Loss of WT	1	Gly187	Yes	Panel sequencing	-	-	Yes	Yes	Absence
11935	chr17:g.7578290C>T	C	T	Intron 5	c.560-1G>A	p.?	Splice site	1215	1303	2518	0.482526	No	1	Gly187	Yes	Panel sequencing	-	-	Yes	Yes	Absence
9998	chr17:g.7578275G>A	G	A	6	c.574C>T	p.(Gln192*)	Nonsense	1295	840	2135	0.606557	No	1	Gln192	No	Panel sequencing	-	-	Yes	Yes	Absence
4893	chr17:g.7578271T>C	T	C	6	c.578A>G	p.(His193Arg)	Missense	229	2620	2849	0.0803791	No	1	His193	No	Panel sequencing	-	-	Yes	-	Overexpressed
12182	chr17:g.7578266dupT	-	T	6	c.583dup	p.(Ile195Asnfs*14)	Frameshift	1108	2890	3998	0.277139	No	1	Ile195	No	Panel sequencing	-	-	-	Yes	Absence
1033	chr17:g.7578259delA	A	-	6	c.590delT	p.(Val197Glyfs*50)	Frameshift	2462	595	3057	0.805365	Loss of WT	1	Val197	No	Panel sequencing	-	c	Yes	Yes	Normal
8473	chr17:g.7578239_7578240delinsAA	CC	AA	6	c.609_610delinsTT	p.Glu204*	Nonsense	51	12	63	0.809524	Loss of WT	1	Glu204	No	WGS	-	e	Yes	Yes	[Not tested]
7438	chr17:g.7578234A>T	A	T	6	c.615T>A	p.(Tyr205*)	Nonsense	897	1315	2212	0.405515	No	1	Tyr205	No	Panel sequencing	-	-	Yes	Yes	Absence
5021	chr17:g.7578212G>A	G	A	5	c.637C>T	p.(Arg213*)	Nonsense	1068	795	1863	0.573269	No	1	Arg213	No	Panel sequencing	-	-	Yes	Yes	Absence
8424	chr17:g.7578205C>A	C	A	6	c.644G>T	p.(Ser215Ile)	Missense	1170	390	1560	0.75	Loss of WT	1	Ser215	No	Panel sequencing	-	c	Yes	-	Overexpressed
2197	chr17:g.7578203C>T	C	T	6	c.646G>A	p.(Val216Met)	Missense	1349	545	1894	0.712249	Loss of WT	3	Val216	Yes	Panel sequencing	-	-	Yes	-	Overexpressed
4841	chr17:g.7578203C>T	C	T	6	c.646G>A	p.(Val216Met)	Missense	566	41	607	0.932455	Loss of WT	3	Val216	Yes	Panel sequencing	-	-	Yes	-	Overexpressed
11539	chr17:g.7578203C>T	C	T	6	c.646G>A	p.(Val216Met)	Missense	698	890	1588	0.439547	No	3	Val216	Yes	Panel sequencing	-	-	Yes	-	Overexpressed
4985	chr17:g.7578191A>G	A	G	6	c.658T>C	p.(Tyr220His)	Missense	542	848	1390	0.389928	No	1	Tyr220	Yes	Panel sequencing	-	c	Yes	-	Overexpressed
12154	chr17:g.7578190T>C	T	C	6	c.659A>G	p.(Tyr220Cys)	Missense	1944	247	2191	0.887266	Loss of WT	3	Tyr220	Yes	Panel sequencing	-	-	Yes	-	Overexpressed
11757	chr17:g.7578190T>C	T	C	6	c.659A>G	p.(Tyr220Cys)	Missense	1269	556	1825	0.695342	Loss of WT	3	Tyr220	Yes	Panel sequencing	-	-	Yes	-	Overexpressed
5232	chr17:g.7578190T>C	T	C	6	c.659A>G	p.(Tyr220Cys)	Missense	437	613	1050	0.41619	No	3	Tyr220	Yes	Panel sequencing	-	-	Yes	-	Overexpressed
66052	chr17:g.7578181_7578185del	GGCGG	-	6	c.664_668del	p.(Pro222*)	Frameshift	697	737	1434	0.486053	No	1	Pro222	No	Panel sequencing	-	-	-	Yes	[Not tested]
9675	chr17:g.7578177C>A	C	A	6	c.672G>T	p.(Glu224Asp)	Missense	1365	427	1792	0.761719	Loss of WT	1	Glu224	No	Panel sequencing	-	-	Yes	-	Absence
4112	chr17:g.7577605_7577606insA	-	A	7	c.675_676insT	p.Gly226Trpfs*3	Frameshift	36	29	65	0.553846	No	1	Gly226	No	WGS	-	e	-	Yes	Absence
3374	chr17:g.7577594_7577595del	AC	-	7	c.686_687del	p.(Cys229Tyrfs*10)	Frameshift	818	1011	1829	0.447239	No	1	Cys229	No	Panel sequencing	-	-	Yes	Yes	Absence
65677	chr17:g.7577586A>C	A	C	7	c.695T>G	p.(Ile232Ser)	Missense	1307	369	1676	0.779833	Loss of WT	1	Ile232	No	Panel sequencing	-	-	Yes	-	Overexpressed
3158	chr17:g.7577569A>C	A	C	7	c.712T>G	p.Cys238Gly	Missense	33	1	34	0.970588	Loss of WT	1	Cys238	No	WGS	-	c, e	Yes	-	Overexpressed
10810	chr17:g.7577566T>C	T	C	7	c.715A>G	p.(Asn239Asp)	Missense	752	161	913	0.823658	Loss of WT	1	Asn239	Yes	Panel sequencing	-	-	Yes	-	Overexpressed
15060	chr17:g.7577565T>G	T	G	7	c.716A>C	p.(Asn239Thr)	Missense	626	2537	3163	0.197913	No	1	Asn239	Yes	Panel sequencing	-	-	Yes	-	Overexpressed
5693	chr17:g.7577565T>C	T	C	7	c.716A>G	p.(Asn239Ser)	Missense	245	392	637	0.384615	No	1	Asn239	Yes	Panel sequencing	-	-	Yes	-	Overexpressed
10418	chr17:g.7577559G>A	G	A	7	c.722C>T	p.(Ser241Phe)	Missense	1029	410	1439	0.71508	Loss of WT	1	Ser241	No	Panel sequencing	rs28934573	-	Yes	-	Overexpressed
6222	chr17:g.7577556C>T	C	T	7	c.725G>A	p.(Cys242Tyr)	Missense	1897	688	2585	0.733849	Loss of WT	1	Cys242	Yes	Panel sequencing	rs121912655	-	Yes	-	Overexpressed
15051	chr17:g.7577555_7577556del	GC	-	7	c.725_726del	p.(Cys242Tyrfs*21)	Frameshift	693	879	1572	0.44084	No	1	Cys242	Yes	Panel sequencing	-	-	-	Yes	Normal
15017	chr17:g.7577547C>A	C	A	7	c.734G>T	p.(Gly245Val)	Missense	531	1505	2036	0.260806	No	1	Gly245	No	Panel sequencing	-	c	Yes	-	Overexpressed
7688	chr17:g.7577544A>G	A	G	7	c.737T>C	p.(Met246Thr)	Missense	440	969	1409	0.312278	No	1	Met246	No	Panel sequencing	-	-	Yes	-	[Not tested]
10719	chr17:g.7577541T>A	T	A	7	c.740A>T	p.Asn247Ile	Missense	33	4	37	0.891892	Loss of WT	1	Asn247	No	WGS	-	e	Yes	-	Overexpressed
5102	chr17:g.7577538C>T	C	T	7	c.743G>A	p.(Arg248Gln)	Missense	1071	1474	2545	0.420825	No	2	Arg248	Yes	Panel sequencing	rs11540652	-	Yes	-	Overexpressed
9374	chr17:g.7577538C>T	C	T	7	c.743G>A	p.(Arg248Gln)	Missense	355	458	813	0.436654	No	2	Arg248	Yes	Panel sequencing	rs11540652	-	Yes	-	Overexpressed
1203	chr17:g.7577535C>A	C	A	7	c.746G>T	p.Arg249Met	Missense	22	7	29	0.758621	Loss of WT	1	Arg249	No	WGS	-	c, e	Yes	-	Overexpressed
66049	chr17:g.7577524dupT	-	T	7	c.757dup	p.(Thr253Asnfs*11)	Frameshift	1244	597	1841	0.67572	No	1	Thr253	No	Panel sequencing	-	-	Yes	Yes	Absence
6483	chr17:g.7577511A>T	A	T	7	c.770T>A	p.Leu257Gln	Missense	60	7	67	0.895522	Loss of WT	1	Leu257	No	WGS	rs28934577	c, e	Yes	-	Overexpressed
5510	chr17:g.7577505T>A	T	A	7	c.776A>T	p.(Asp259Val)	Missense	839	563	1402	0.598431	No	1	Asp259	No	Panel sequencing	-	-	Yes	-	Overexpressed
11724	chr17:g.7577128A>T	A	T	8	c.810T>A	p.(Phe270Leu)	Missense	5725	222	5947	0.96267	Loss of WT	1	Phe270	No	Panel sequencing	-	-	Yes	-	Overexpressed
10124	chr17:g.7577127C>T	C	T	8	c.811G>A	p.Glu271Lys	Missense	21	15	36	0.583333	No	1	Glu271	No	WGS	-	e	Yes	-	Overexpressed
15062	chr17:g.7577124C>T	C	T	8	c.814G>A	p.(Val272Met)	Missense	341	3308	3649	0.0934503	No	1	Val272	No	Panel sequencing	-	-	Yes	-	Overexpressed
4451	chr17:g.7577121G>A	G	A	8	c.817C>T	p.(Arg273Cys)	Missense	1291	2404	3695	0.349391	No	1	Arg273	Yes	Panel sequencing	rs121913343	c	Yes	-	Overexpressed
11866	chr17:g.7577120C>T	C	T	8	c.818G>A	p.(Arg273His)	Missense	2083	2684	4767	0.436962	No	5	Arg273	Yes	Panel sequencing	rs28934576	-	Yes	-	Overexpressed
1276	chr17:g.7577120C>T	C	T	8	c.818G>A	p.(Arg273His)	Missense	1745	480	2225	0.78427	Loss of WT	5	Arg273	Yes	Panel sequencing	rs28934576	-	Yes	-	Overexpressed
2811	chr17:g.7577120C>T	C	T	8	c.818G>A	p.(Arg273His)	Missense	2053	1408	3461	0.593181	No	5	Arg273	Yes	Panel sequencing	rs28934576	-	Yes	-	Overexpressed
8471	chr17:g.7577120C>T	C	T	8	c.818G>A	p.(Arg273His)	Missense	2125	827	2952	0.719851	Loss of WT	5	Arg273	Yes	Panel sequencing	rs28934576	-	Yes	-	[Not tested]
15023	chr17:g.7577120C>T	C	T	8	c.818G>A	p.Arg273His	Missense	2132	1475	3607	0.591073	No	5	Arg273	Yes	Panel sequencing	rs28934576	c, d, e	Yes	-	Overexpressed
15075	chr17:g.7577114C>A	C	A	8	c.824G>T	p.(Cys275Phe)	Missense	1295	1648	2943	0.440027	No	1	Cys275	No	Panel sequencing	-	-	Yes	-	Overexpressed
15037	chr17:g.7577096T>C	T	C	8	c.842A>G	p.(Asp281Gly)	Missense	1968	1920	3888	0.506173	No	1	Asp281	No	Panel sequencing	-	-	Yes	-	Overexpressed
12048	chr17:g.7577094G>C	G	C	8	c.844C>G	p.(Arg282Gly)	Missense	747	952	1699	0.43967	No	1	Arg282	No	Panel sequencing	-	-	Yes	-	Overexpressed
4956	chr17:g.7577082C>T	C	T	8	c.856G>A	p.Glu286Lys	Missense	10	31	41	0.243902	No	1	Glu286	No	WGS	-	c, e	Yes	-	Overexpressed
8836	chr17:g.7577022G>A	G	A	8	c.916C>T	p.(Arg306*)	Nonsense	1134	860	1994	0.568706	No	1	Arg306	No	Panel sequencing	rs121913344	-	Yes	Yes	Normal
15045	chr17:g.7576928T>C	T	C	Intron 8	c.920-2A>G	p.[Ala307Aspfs*5, Leu308Profs*31]	Splice site	1527	1581	3108	0.491313	No	2	Ala307	Yes	Panel sequencing	-	d, e	Yes	Yes, Yes	Normal
6321	chr17:g.7576928T>C	T	C	Intron 8	c.920-2A>G	p.[Ala307Aspfs*5, Leu308Profs*31]	Splice site	11	30	41	0.268293	No	2	Ala307	Yes	WGS	-	e	Yes	Yes, Yes	Cytoplasmic
11024	chr17:g.7576852C>G	C	G	Intron 9	c.993+1G>C	p.?	Splice site	1413	2059	3472	0.40697	No	1	Gln331	No	Panel sequencing	-	-	Yes	Yes	Normal
6486	chr17:g.7574003G>A	G	A	10	c.1024C>T	p.(Arg342*)	Nonsense	1212	1354	2566	0.47233	No	1	Arg342	No	Panel sequencing	-	-	Yes	Yes	Cytoplasmic
Abbreviations: WT, wild-type; chr, chromosome; del, deletion; ins, insertion; delins, deletion/insertion; dup, duplication; LOH, loss of heterozygosity; WGS, whole-genome sequencing; NMD, nonsense mediated decay; IARC, International Agency for Research on Cancer (http://www.iarc.fr/).
aGenBank accession number: TP53, NM_000546.4
bVariant nomenclature according to Human Genome Variation Society (HGVS) guidelines (http://www.hgvs.org/). Variants are ordered by codon number.
*Mutation was independently confirmed using: c, Sanger sequencing of tumour DNA in Ahmed et al., 2010; d, whole-genome sequencing of tumour DNA in Patch et al., 2015; e, transcriptome sequencing of tumour RNA in Patch et al., 2015.
